# Supplementary material
Source: PubMed Central journal article supplement (PMC11585079)
Supplement: NIHMS2032665-supplement-Supporting_Information.pdf [file NIHMS2032665-supplement-Supporting_Information.pdf]

## Supporting Information

### **Factors influencing the detergent-free membrane protein isolation using synthetic nanodisc-forming polymers**

Bankala Krishnarjuna,<sup>a</sup> Gaurav Sharma,<sup>a</sup> Thirupathi Ravula and Ayyalusamy Ramamoorthy<sup>b\*</sup>

*Biophysics Program, Department of Chemistry, Biomedical Engineering, Macromolecular Science and Engineering, and Michigan Neuroscience Institute, The University of Michigan, Ann Arbor, MI 48109, USA.*

*National High Magnetic Field Laboratory, Department of Chemical and Biomedical Engineering, Florida State University, Tallahassee, FL 32310, USA.*

#### **\*Corresponding Author:**

Ayyalusamy Ramamoorthy; Email: [ramamoor@umich.edu](mailto:ramamoor@umich.edu); [aramamoorthy@fsu.edu](mailto:aramamoorthy@fsu.edu)

<sup>a</sup>equal contribution

## **Amino acid sequences**

### *Rat flavin mononucleotide binding domain (FBD) of cytochrome P450 reductase*

MGDSHEDTSATMPEAVAEEVSLFSTTDMVLFSLIVGVLTYWFIFRKKKEEIPFESKIQTAPPV  
KESFVEKMKKTGRNIIVFYGSQTGTAEFFANRLSKDAHRYGMRGMSADPEEYDLADLSSLPEI  
DKSLVVFCMATYGECDPTDNAQDFYDWLQETDVDLTGVKFAVFGLGNKTYEHFNAMGKYVDQRL  
EQLGAQRIFELGLGDDDDGNLEEDFITWREQFWPAVCEFFGVEATGEEHHHHHH

### *Rabbit cytochrome-b5*

GHHHHHAAQSDKDVKYITLEEIKKHNSKSTWLIILHHKVYDLTKFLEEHPGGEEVLREQAGD  
ATENFEDVGHSTDARELSKTFIIGELHPDDRSKLSKPMETLITTVDSSNSSWWTNWVIPAISALI  
VALMYRLYMADD

Transmembrane domains are underlined.

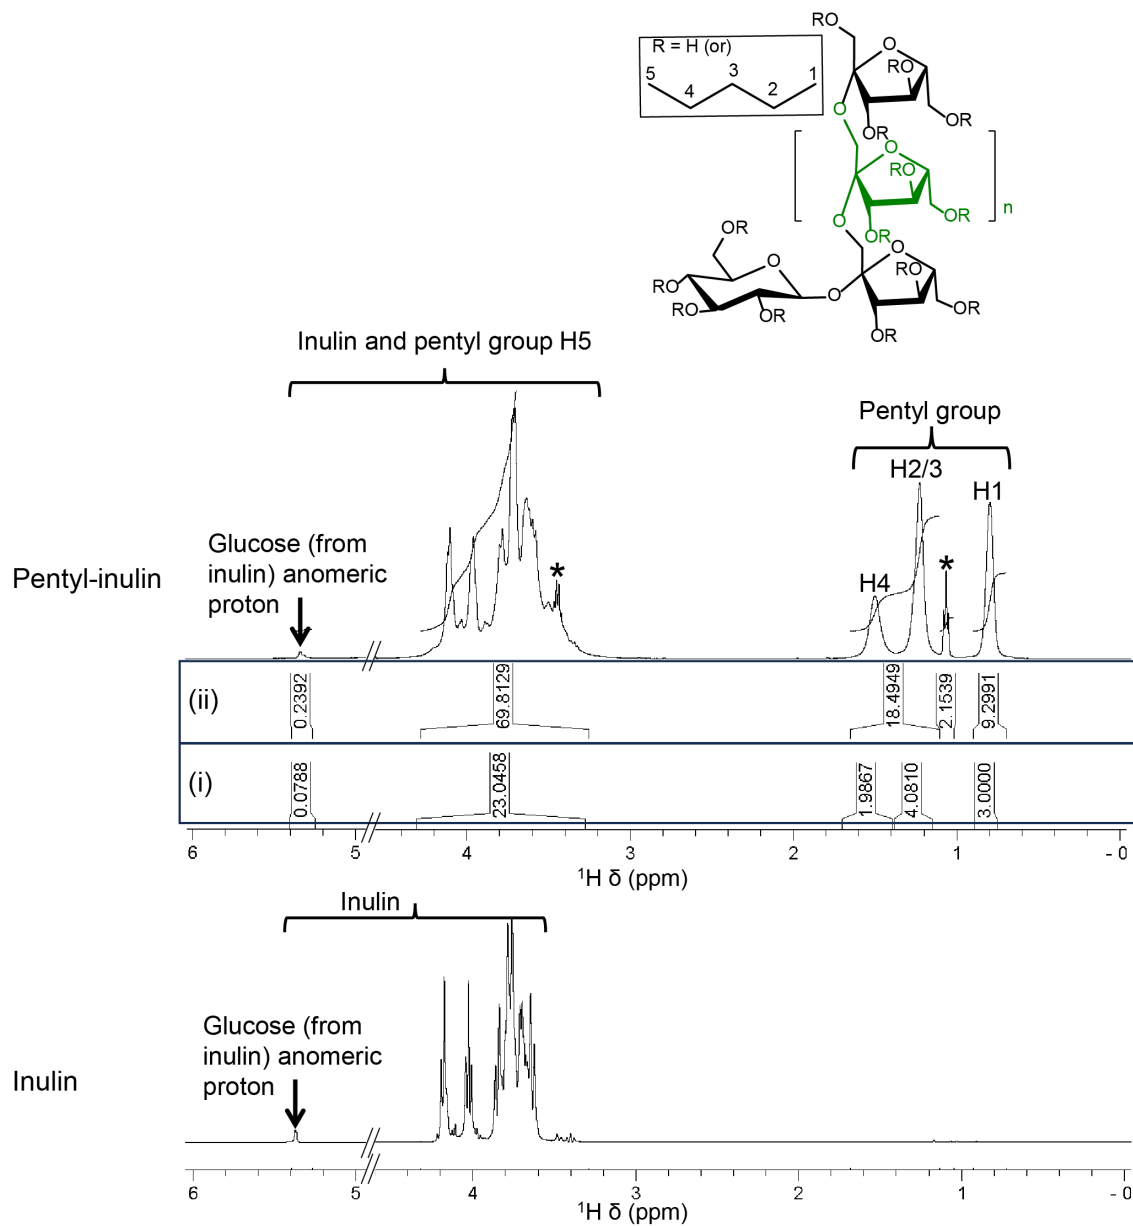

**Figure S1A.**  $^1\text{H}$  NMR analysis of inulin and pentyl-inulin. The peaks are labelled with assignments. The degree of functionalization and the percentage of impurities (indicated with ‘\*’) are measured using peak intensities in NMR spectra. (box-i) integral values to calculate the degree of functionalization ( $\sim 0.33$ ; see methods of the equation). (box-ii) integral values to estimate the percentage of impurities (possibly diethyl ether) in the pentyl-inulin sample. The chemical structure of pentyl-inulin is shown at the top. The water proton peak is omitted from the NMR spectra for clarity.

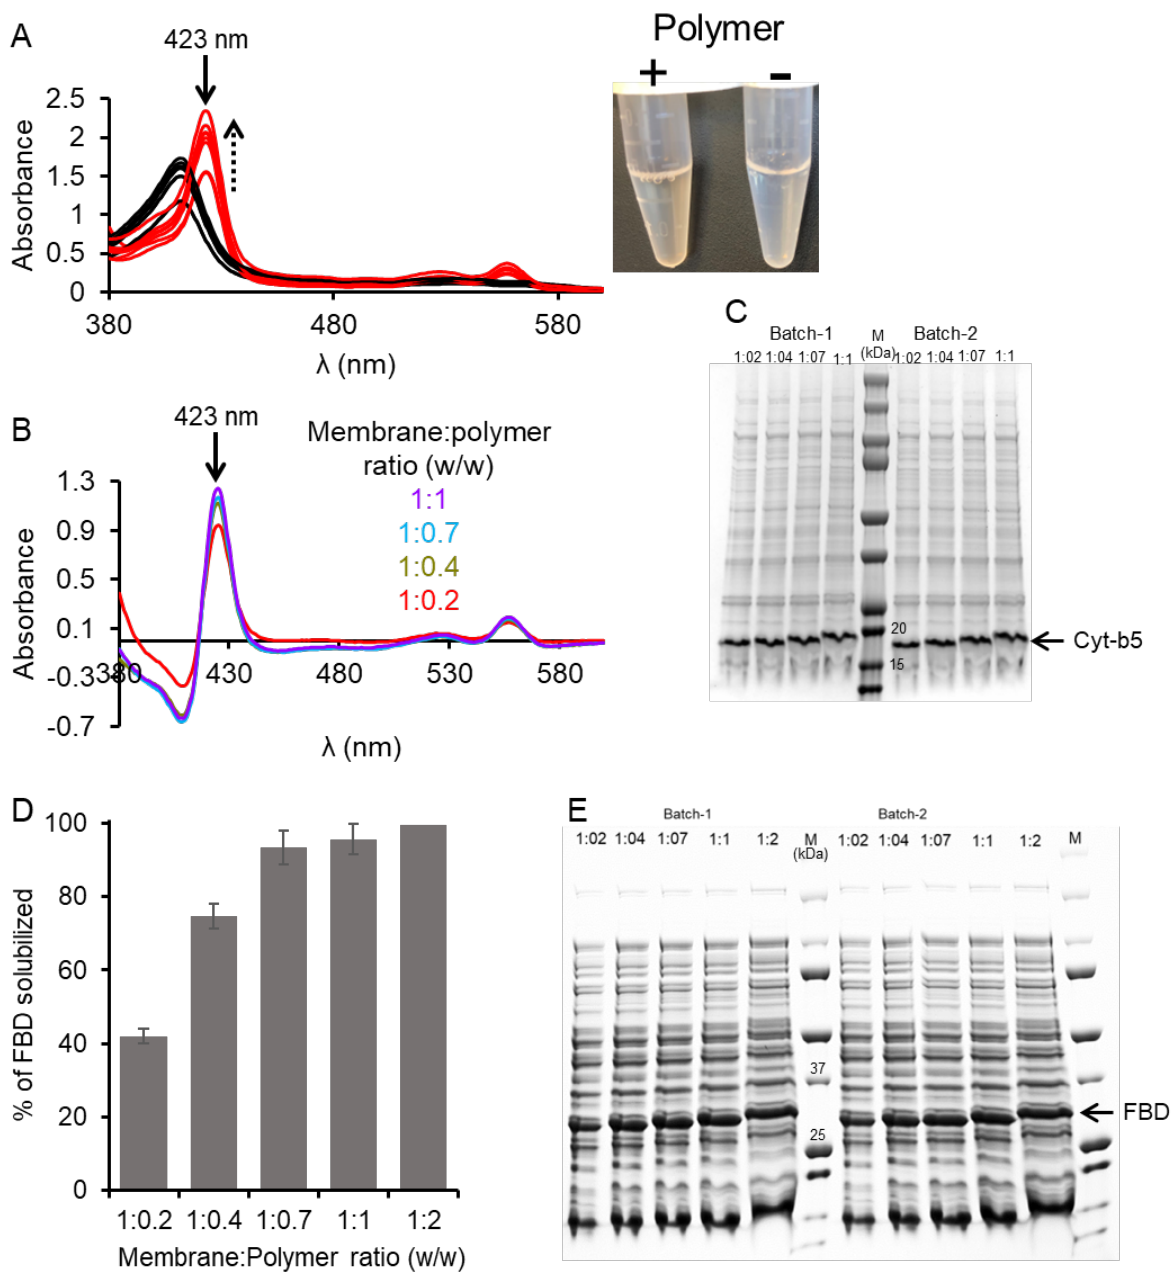

**Figure S1B.** (A) Absorbance spectra of oxidized (black) and sodium dithionite reduced Cyt-b5 in *E. coli* lipid-pentyl-inulin nanodiscs. The samples were made using 4 different membrane:polymer (w/w) ratios as indicated. The absorbance peak intensity change at 423 nm is indicated with an upside dotted arrow. Picture: The light-red colored (left-side) and colorless (right-side) solutions in tubes are supernatants after centrifugation of Cyt-b5-enriched cell membranes with and without polymer, respectively. (B) Difference absorbance spectra (reduced minus oxidized) of pentyl-

inulin-solubilized *E. coli* membranes enriched with a ~15.7-kDa rabbit cytochrome-b5 showing the maximal absorbance differences at 409, 423, 526 and 556 nm. The data were collected on the solubilization samples prepared using 4 different polymer concentrations as indicated. (C) SDS-PAGE analysis of pentyl-inulin-solubilized Cyt-b5-rich *E. coli* cell membranes. (D) Bar plot depicting the percentage of 27.8-kDa FBD protein band intensities at 5 different membrane:polymer ratios (w/w) as indicated. (E) SDS-PAGE analysis of pentyl-inulin-solubilized FBD-rich *E. coli* cell membranes. Both Cyt-b5 and FBD are anchored to the lipid membrane via a transmembrane helical domain. The solubilization experiments were performed in technical replicates (Batch 1 and 2). Cyt-b5 and FBD proteins have been directly isolated using SMA-EA and pentyl-inulin polymers, respectively [1-4].

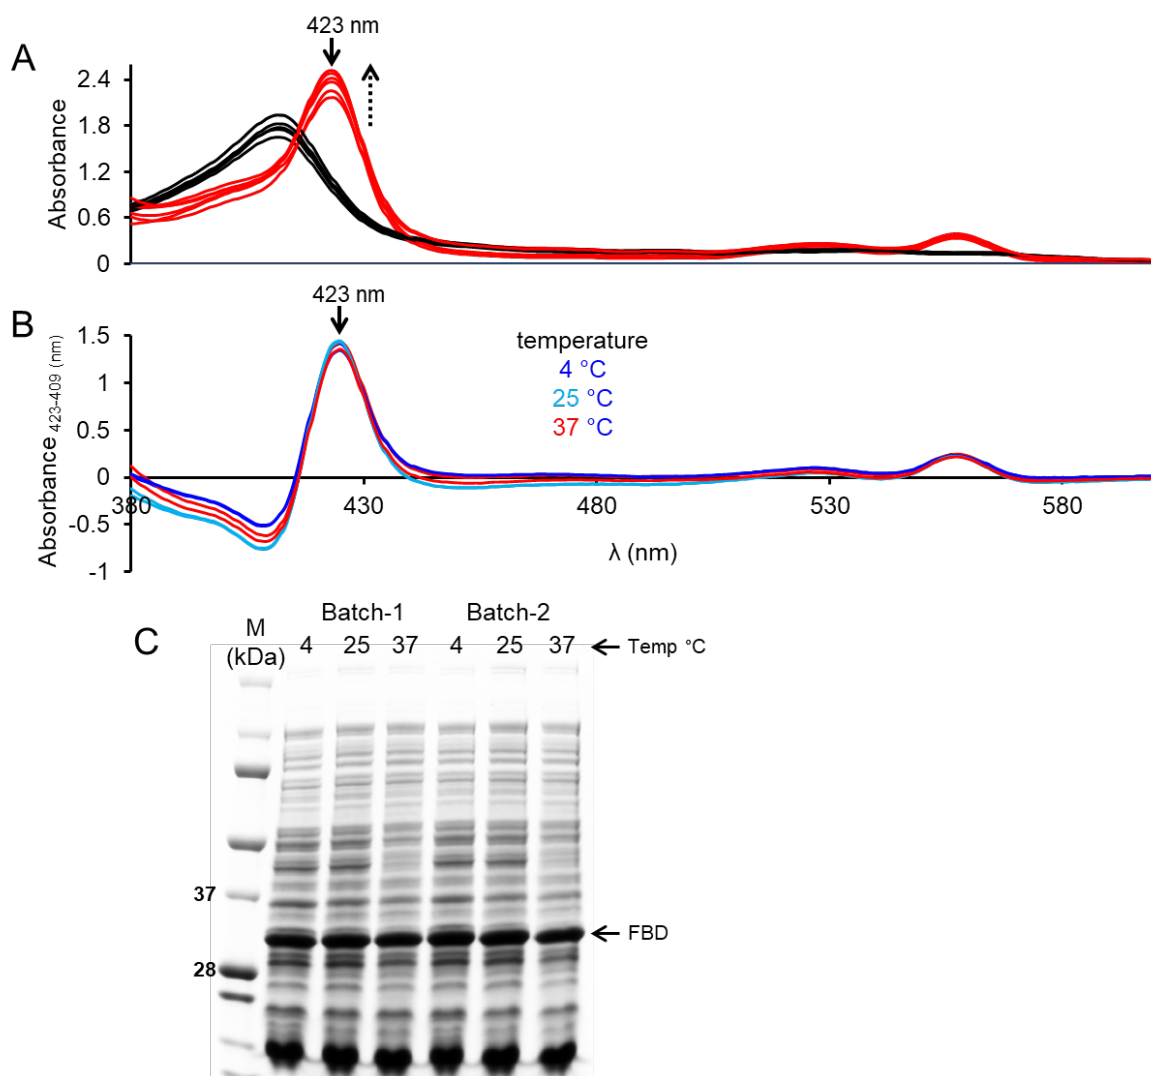

**Figure S2.** (A) Absorbance spectra of oxidized (black) and sodium dithionite reduced Cyt-b5 in *E. coli* lipid-pentyl-inulin nanodiscs. The samples were made using 1:1 membrane:polymer (w/w) ratio and solubilization was performed at 3 different temperatures as indicated. The absorbance peak intensity change at 423 nm is indicated with upside dotted arrow. (B) Difference absorbance spectra (reduced minus oxidized) of pentyl-inulin-solubilized *E. coli* membranes enriched with a ~15.7-kDa rabbit cytochrome-b5 showing the maximal absorbance differences at 409 and 423 nm. The data were collected on the solubilization samples prepared at 3 different temperature conditions as indicated. (C) SDS-PAGE analysis of pentyl-inulin-solubilized 27.8-kDa FBD-rich *E. coli* cell membranes obtained at different temperature conditions. M denotes the protein marker. The solubilization experiments were performed in technical replicates (Batch 1 and 2).

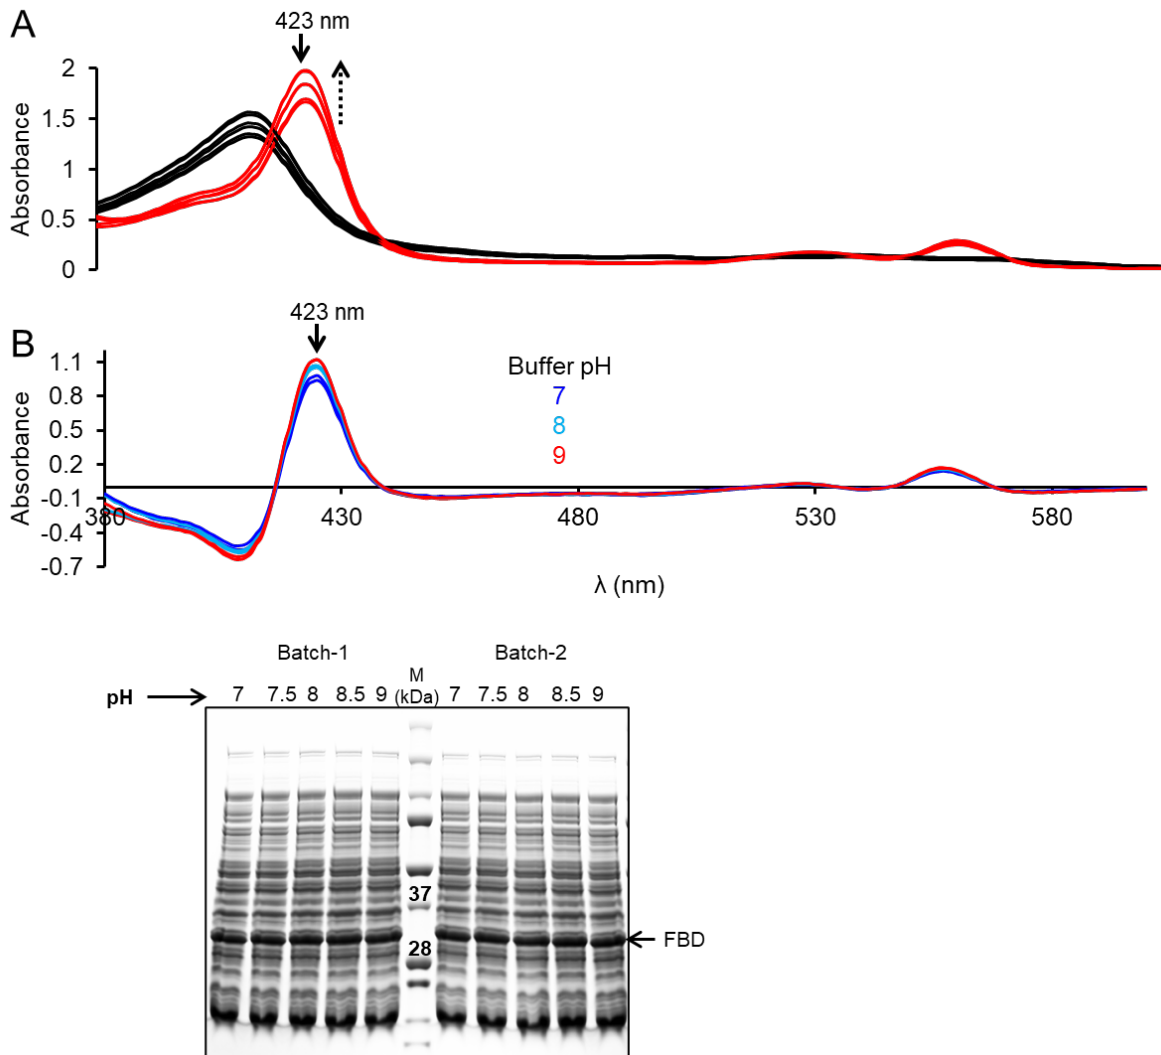

**Figure S3.** (A) Absorbance spectra of oxidized (black) and sodium dithionite reduced Cyt-b5 in *E. coli* lipid-pentyl-inulin nanodiscs. The samples were made using 1:1 membrane:polymer (w/w) ratio and solubilization was performed at 3 different pH conditions as indicated. The absorbance peak intensity change at 423 nm is indicated with an upside dotted arrow. (B) Difference absorbance spectra (reduced minus oxidized) of pentyl-inulin-solubilized *E. coli* membranes enriched with a ~15.7-kDa rabbit cytochrome-b5 showing the maximal absorbance differences at 409 and 423 nm. The data were collected on the solubilization samples prepared at 3 different pH conditions as indicated. (C) SDS-PAGE analysis of pentyl-inulin-solubilized 27.8-kDa FBD-rich *E. coli* cell membranes at different pH conditions. M denoted the protein marker. The solubilization experiments were performed in technical replicates.

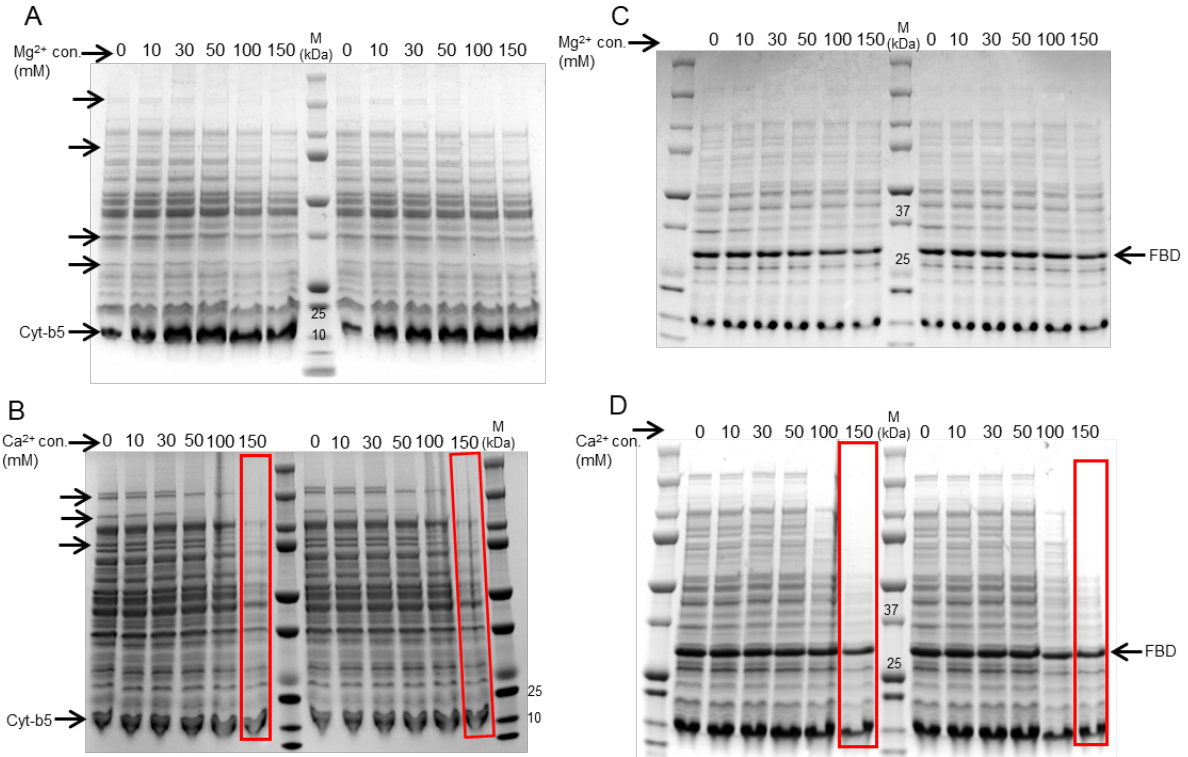

**Figure S4.** SDS-PAGE analysis of Cyt-b5 (A, B) and FBD-enriched (C, D) *E. coli* membranes that were solubilized using pentyl-inulin at the indicated concentrations of divalent metal ions. The protein band corresponding to Cyt-b5 and FBD are labelled, and the variations in the protein band intensity of *E. coli* membrane proteins at different metal ion concentrations are indicated with arrows. Only the well-resolved protein bands showing variation with different metal ion concentrations are indicated for clarity. The lanes highlighted in (B) and (D) with red boxes indicate a significant decrease in the intensity of protein bands at higher concentrations of divalent metal ions. The solubilization experiments were performed in technical replicates. M: protein marker



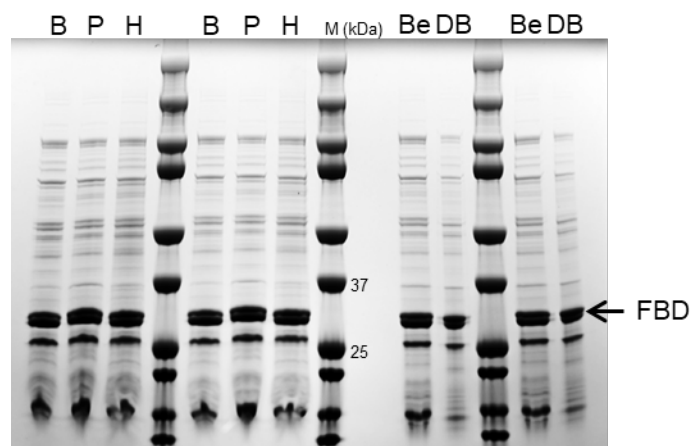

**Figure S5.** SDS-PAGE analysis of FBD-enriched *E. coli* membranes that were solubilized using inulin functionalized with butyl (B), pentyl (P), hexyl, (H), benzyl (Be) and di-benzyl (DB) hydrophobic groups. The solubilization experiments were performed in technical replicates.

## References

- [1] B. Krishnarjuna, A. Ramamoorthy, Detergent-free isolation of membrane proteins and strategies to study them in a near-native membrane environment, *Biomolecules*, 12 (2022) 1076.
- [2] B. Krishnarjuna, T. Ravula, A. Ramamoorthy, Detergent-free extraction, reconstitution and characterization of membrane-anchored cytochrome-b5 in native lipids, *ChemComm*, 56 (2020) 6511-6514.
- [3] T. Ravula, A. Ramamoorthy, Synthesis, characterization, and nanodisc formation of non-ionic polymers, *Angew. Chem. Int. Ed.*, 60 (2021) 16885-16888.
- [4] T. Ravula, S.K. Ramadugu, G. Di Mauro, A. Ramamoorthy, Bioinspired, size-tunable self-assembly of polymer-lipid bilayer nanodiscs, *Angew. Chem. Int. Ed.*, 56 (2017) 11466-11470.
